# Supplementary material for: MetaboAnalystR 2.0: From Raw Spectra to Biological Insights
Source: PubMed Central journal article supplement (PMC6468840; doi:10.3390/metabo9030057), 2019-03-22
Supplement: metabolites-09-00057-s001.pdf [file metabolites-09-00057-s001.pdf]

## Supplemental Information

### The MetaboAnalystR 2.0: From Raw Spectra to Biological Insights

Jasmine Chong, Mai Yamamoto, and Jianguo Xia

**Table S1.** Characteristics of pediatric IBD patients and healthy controls included in this study.

|                                  | CD          | Healthy   |
|----------------------------------|-------------|-----------|
| <b>n</b>                         | 24          | 24        |
| <b>Female gender (n)</b>         | 9           | 15        |
| <b>Median age, years (range)</b> | 14.5 (8-19) | 11 (6-17) |

**Table S2.** Suggested peak picking parameters for commonly used LC-MS platforms.

| Vendor  | Instrument                            | SetPeakParam() |         |         |
|---------|---------------------------------------|----------------|---------|---------|
|         |                                       | ppm            | min_pkw | max_pkw |
| Agilent | HPLC/Q-TOF                            | 30             | 10      | 60      |
| Agilent | HPLC/UHD Q-TOF                        | 15             | 10      | 60      |
| Agilent | HILIC HPLC/UHD Q-TOF neg <sup>1</sup> | 15             | 10      | 120     |
| Bruker  | HPLC/Q-TOF neg <sup>1</sup>           | 10             | 10      | 60      |
| Bruker  | HPLC/Q-TOF pos <sup>1</sup>           | 10             | 5       | 20      |
| ABSciex | UPLC/TripleTOF                        | 15             | 5       | 20      |
| Waters  | UPLC/HRMS                             | 15             | 2       | 25      |
| Waters  | HPLC/TOF                              | 30             | 10      | 60      |
| Thermo  | UPLC/Q-Exactive                       | 5              | 5       | 20      |
| Thermo  | HPLC/Orbitrap                         | 3              | 10      | 60      |

<sup>1</sup> neg = negative ion mode, pos = positive ion mode

Parameters are extracted from XCMS Online default settings (PMID 29494574)

**Table S3.** Raw datasets used in the Case Studies

| Case Study     | Link                                                                                                                                                            |
|----------------|-----------------------------------------------------------------------------------------------------------------------------------------------------------------|
| Benchmark data | <a href="https://drive.google.com/drive/folders/1PRDIvihGFgkmErp2fWe41UR2Qs2VY_5G">https://drive.google.com/drive/folders/1PRDIvihGFgkmErp2fWe41UR2Qs2VY_5G</a> |
| IBD data       | <a href="https://ibdmdb.org/tunnel/public/summary.html">https://ibdmdb.org/tunnel/public/summary.html</a> , under the subheadings HMP2, Metabolites, 2017.23    |

**Table S4.** Parameters used to convert .RAW files to mzML format on ProteoWizard MSConvert.

| Filter category              | Parameter                  |
|------------------------------|----------------------------|
| <b>Peak picking</b>          | Vendor msLevel = 1 -       |
| <b>Threshold Peak Filter</b> | Absolute 1000 most-intense |
| <b>Subset</b>                | msLevel 1 – 1              |

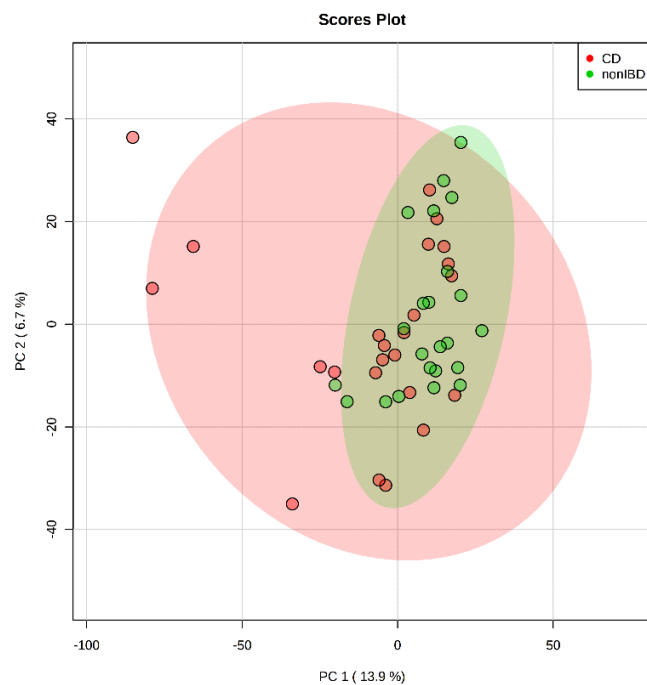

**Figure S1.** PCA plot of pediatric IBD stool metabolome. Data including 4113 features were median-normalized, log-transformed and auto-scaled.

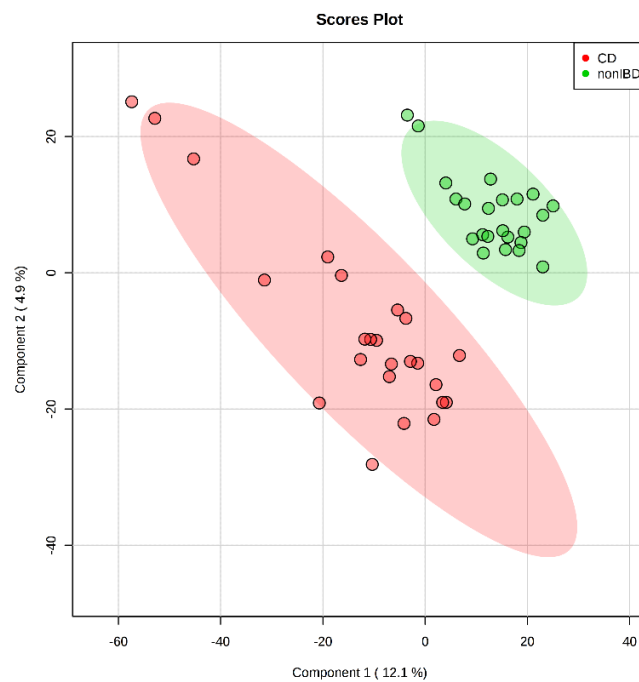

**Figure S2.** PLS-DA plot of pediatric IBD stool metabolome. Data including 4113 features were median-normalized, log-transformed and auto-scaled.

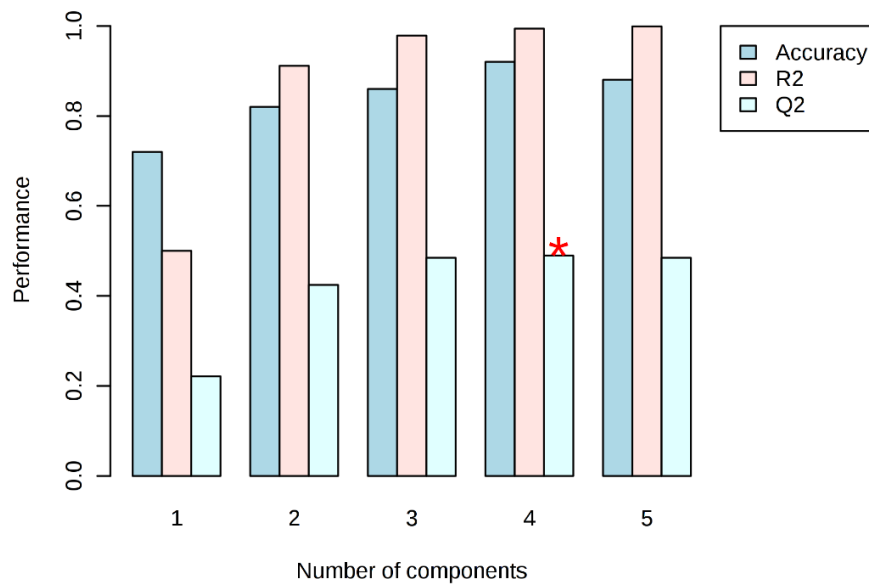

**Figure S3.** 10-fold cross validation of PLS-DA model (Figure S2) generated from the pediatric IBD stool metabolome data.

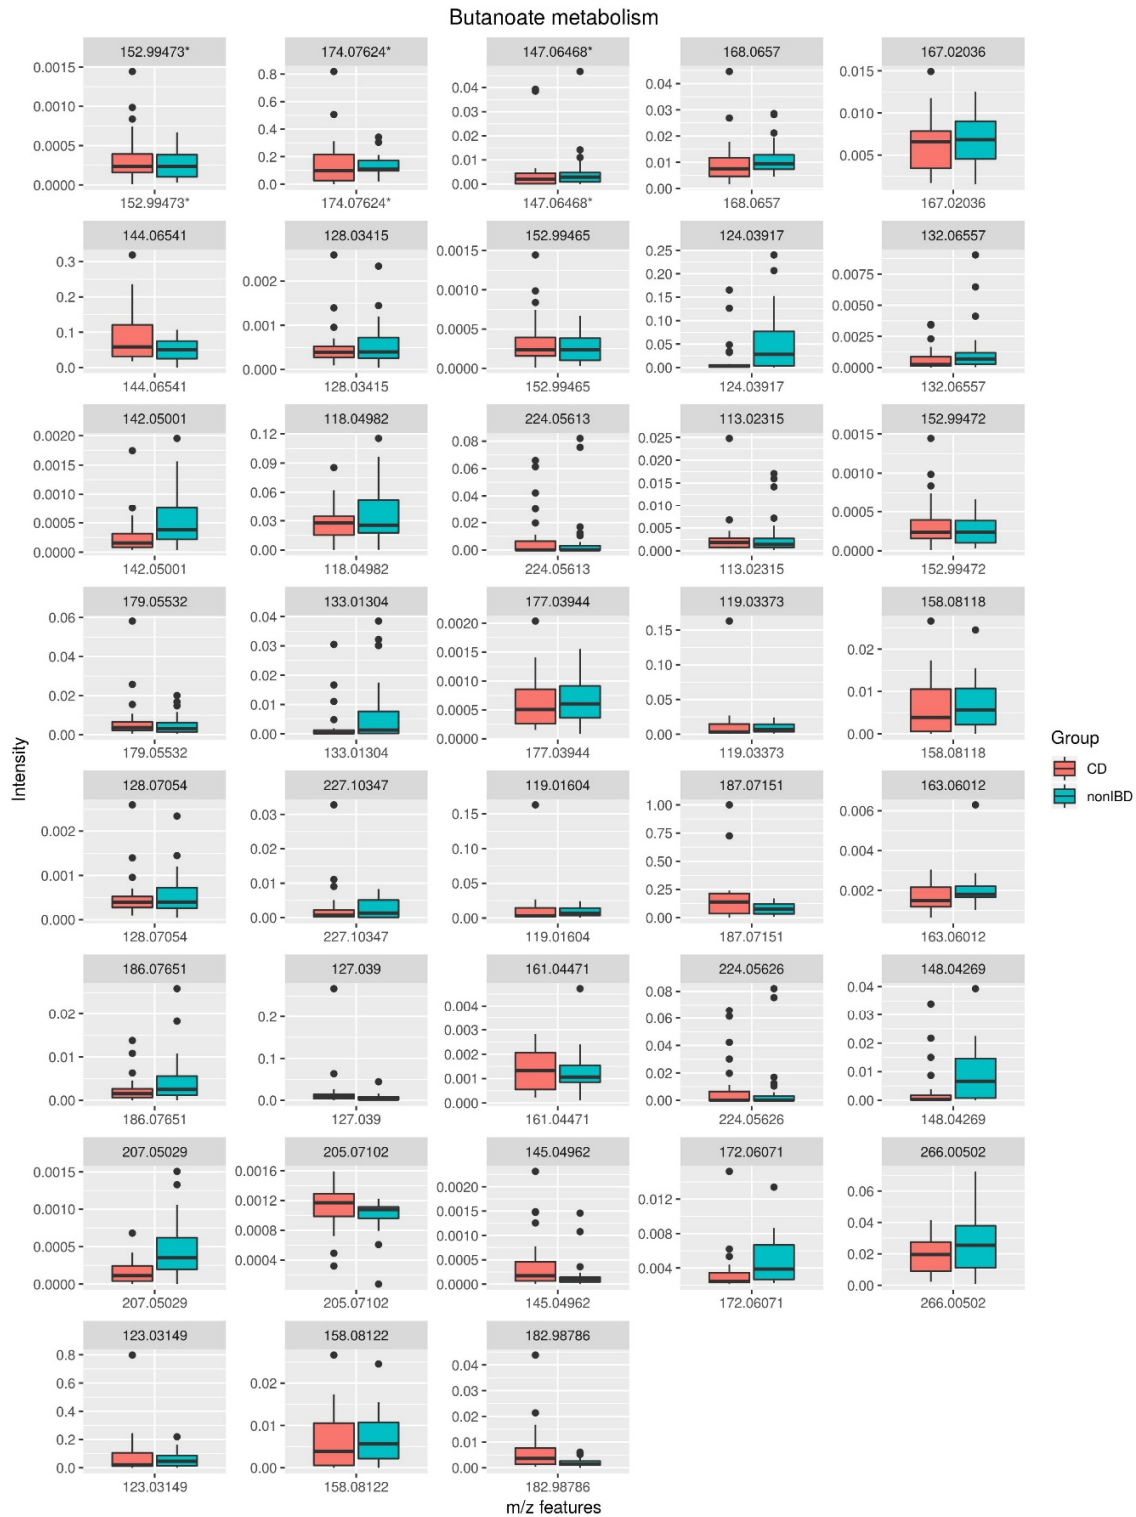

**Figure S4.** Boxplots of m/z features used for functional interpretation. The m/z features with an asterisk were used by the mummichog algorithm, while all m/z features were used by the GSEA algorithm. The red boxes represent Crohn's disease pediatric patients, and the blue boxes represent healthy patients.

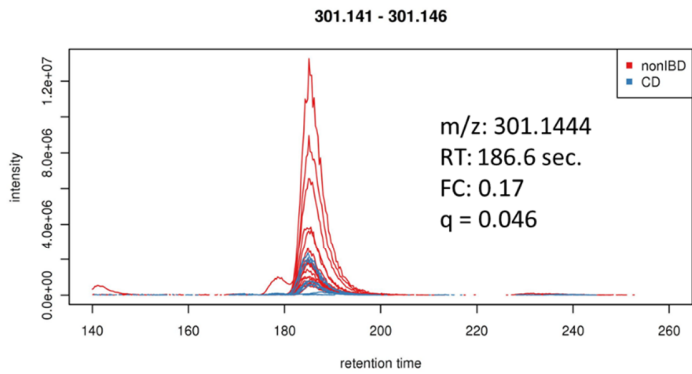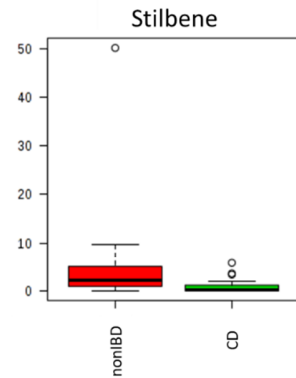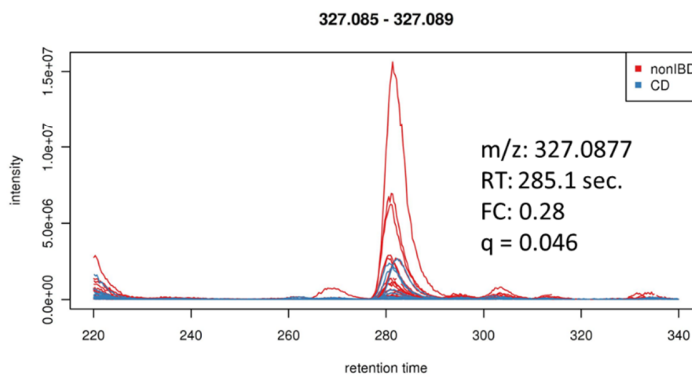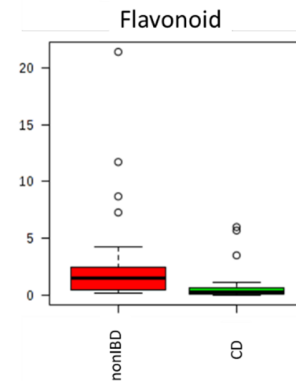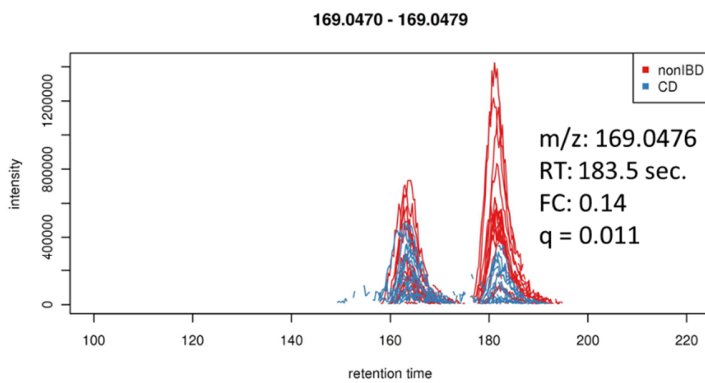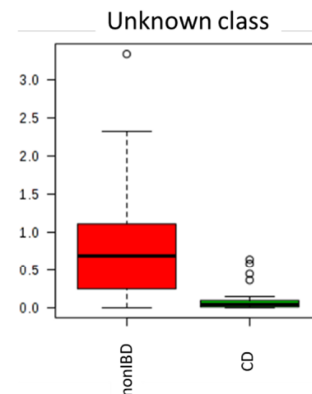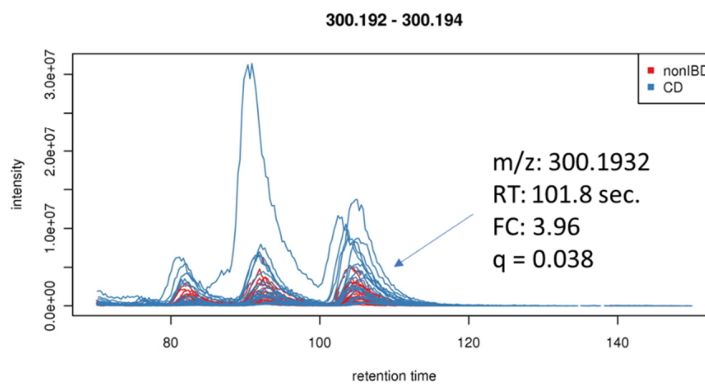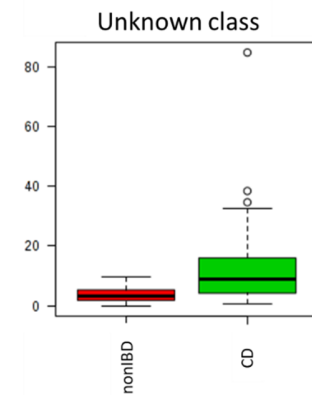

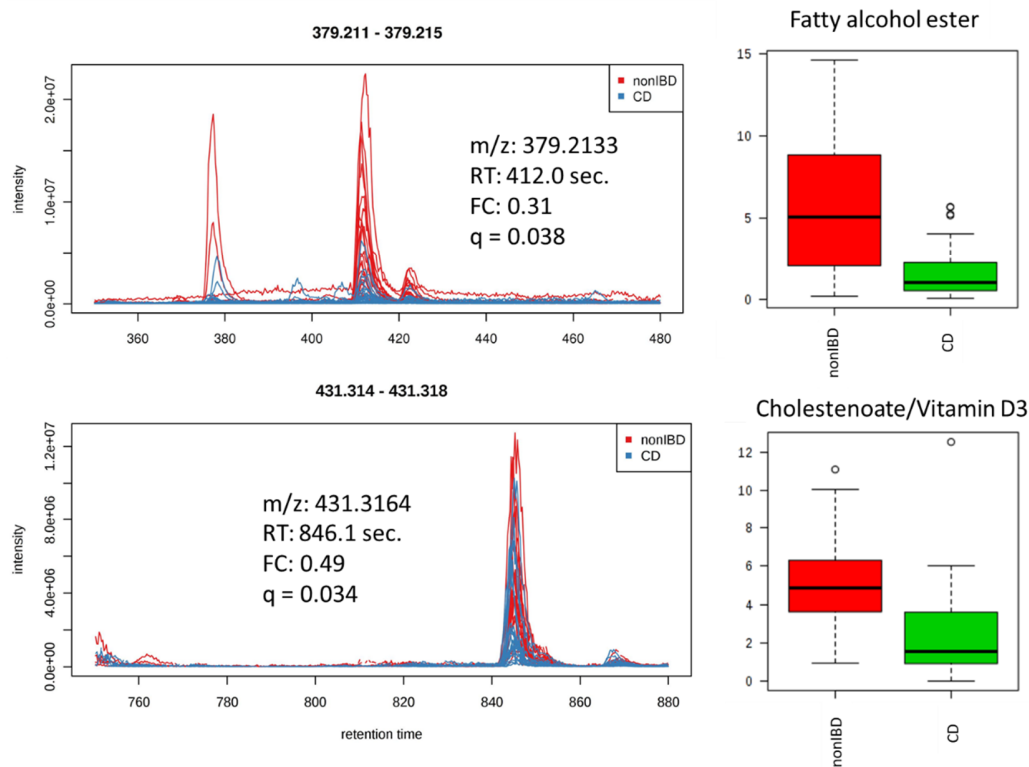

**Figure S5.** Representative EICs and boxplots of compounds differentially excreted in stool samples of healthy children and pediatric CD patients based on pathway analysis and Mann-Whitney U test (FDR adjusted p-value < 0.05). The m/z of all compounds highlighted above exactly matches with the m/z of compounds detected in the previously published study on adult IBD patients (PMID: 30531976). Putative IDs of each compound assigned in this study are shown above each boxplot.
